# Supplementary material for: Raltegravir 1200 mg Once Daily vs 400 mg Twice Daily, With Emtricitabine and Tenofovir Disoproxil Fumarate, for Previously Untreated HIV-1 Infection: Week 96 Results From ONCEMRK, a Randomized, Double-Blind, Noninferiority Trial
Source: PubMed Central journal article supplement — J Acquir Immune Defic Syndr. 2018 May 25;78(5):589–98. doi: 10.1097/QAI.0000000000001723 (PMC6075877; doi:10.1097/qai.0000000000001723), 2018-05-25
Supplement: qai-78-589-s001.pdf [file qai-78-589-s001.pdf]

## Participant Demographics and Baseline Characteristics

|                                                    | RAL 1200 mg QD <sup>a</sup><br>(n=531) | RAL 400 mg BID <sup>a</sup><br>(n=266) | Total<br>(N=797)     |
|----------------------------------------------------|----------------------------------------|----------------------------------------|----------------------|
| Male, n (%)                                        | 440 (82.9)                             | 234 (88.0)                             | 674 (84.6)           |
| Race, n (%)                                        |                                        |                                        |                      |
| White                                              | 301 (56.7)                             | 172 (64.7)                             | 473 (59.3)           |
| Black or African American                          | 98 (18.5)                              | 36 (13.5)                              | 134 (16.8)           |
| Asian                                              | 83 (15.6)                              | 40 (15.0)                              | 123 (15.4)           |
| Multiple                                           | 46 (8.7)                               | 14 (5.3)                               | 60 (7.5)             |
| Other <sup>b</sup>                                 | 3 (0.6)                                | 4 (1.5)                                | 7 (0.9)              |
| Hispanic or Latino Ethnicity, n (%)                | 126 (23.7)                             | 52 (19.5)                              | 178 (22.3)           |
| Age in years, mean (SD) [min, max]                 | 35.4 (10.3) [18, 66]                   | 36.9 (11.0) [19, 84]                   | 35.9 (10.5) [18, 84] |
| History of AIDS, n (%)                             | 79 (14.9)                              | 29 (10.9)                              | 108 (13.6)           |
| HIV-1 subtype B, n (%)                             | 335 (63.1)                             | 186 (69.9)                             | 521 (65.4)           |
| Hepatitis B and/or C positive <sup>c</sup> , n (%) | 15 (2.8)                               | 8 (3.0)                                | 23 (2.9)             |
| Baseline HIV-1 RNA                                 |                                        |                                        |                      |
| log <sub>10</sub> copies/mL, mean (SD)             | 4.6 (0.7)                              | 4.6 (0.7)                              | 4.6 (0.7)            |
| >100,000 copies/mL, n (%)                          | 149 (28.1)                             | 77 (28.9)                              | 226 (28.4)           |
| >500,000 copies/mL, n (%)                          | 25 (4.7)                               | 15 (5.6)                               | 40 (5.0)             |
| Baseline CD4+ T-cell count                         |                                        |                                        |                      |
| Cells/μL, mean (SD)                                | 407.6 (213.7)                          | 428.9 (217.3)                          | 414.7 (215.0)        |
| <200 cells/mm <sup>3</sup> , n (%)                 | 69 (13.0)                              | 37 (13.9)                              | 106 (13.2)           |
| <50 cells/mm <sup>3</sup> , n (%)                  | 9 (1.7)                                | 6 (2.3)                                | 15 (1.9)             |

<sup>a</sup> In combination with FTC/TDF once daily.

<sup>b</sup> Other races include American Indian, Alaska Native, Native Hawaiian, or Other Pacific Islander.

<sup>c</sup> Evidence of hepatitis B surface antigen and/or HCV RNA.
